# Supplementary material
Source: PubMed Central journal article supplement (PMC7587092)
Supplement: JCM.00147-20-s0001.pdf [file JCM.00147-20-s0001.pdf]

## Supplemental Figure 1

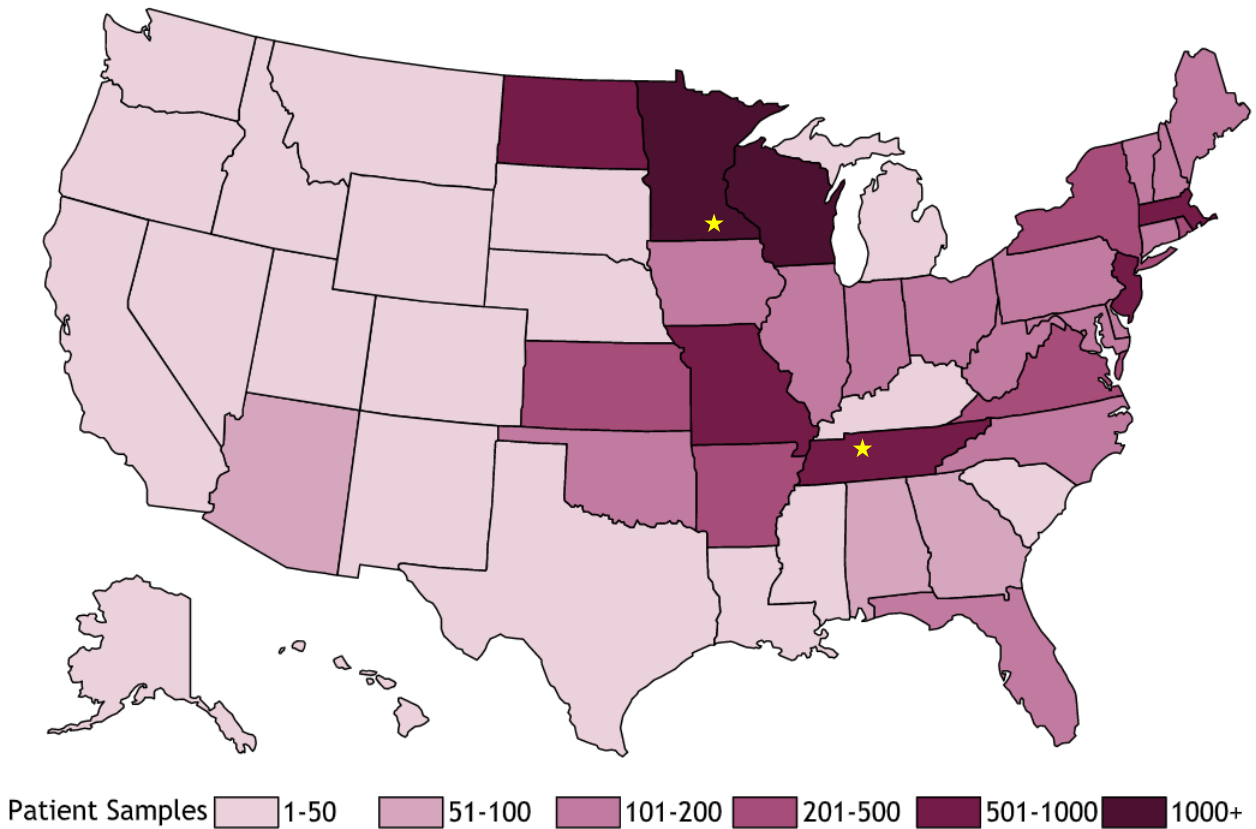

Supplemental Fig 1: Geographic distribution of the ordering provider for the 13,038 residual clinical specimens tested in this study. Differential shading indicates the number of patient specimens submitted from each state. The location of Mayo Clinic (Minnesota) and Vanderbilt University (Tennessee) are indicated by stars. Map generated with Google Charts: <https://developers.google.com/chart/>

## Supplemental Fig 2

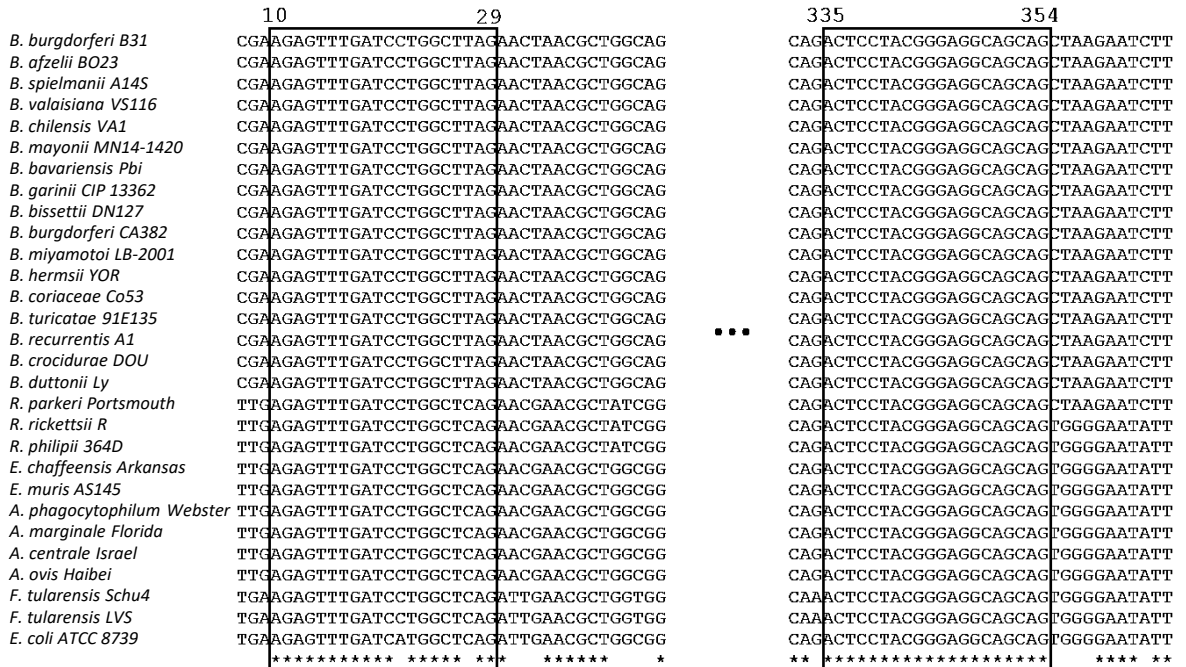

Supplemental Fig 2: V1-V2 partial alignment corresponding to 28 tickborne bacterial species and *E. coli*. Forward and reverse binding sites are boxed. The numbers above the boxes represent the nucleotide positions based on the *B. burgdorferi* B31 16S rRNA gene sequence (NC\_001318.1). The asterisks indicate conserved nucleotides.

### Supplemental Fig 3

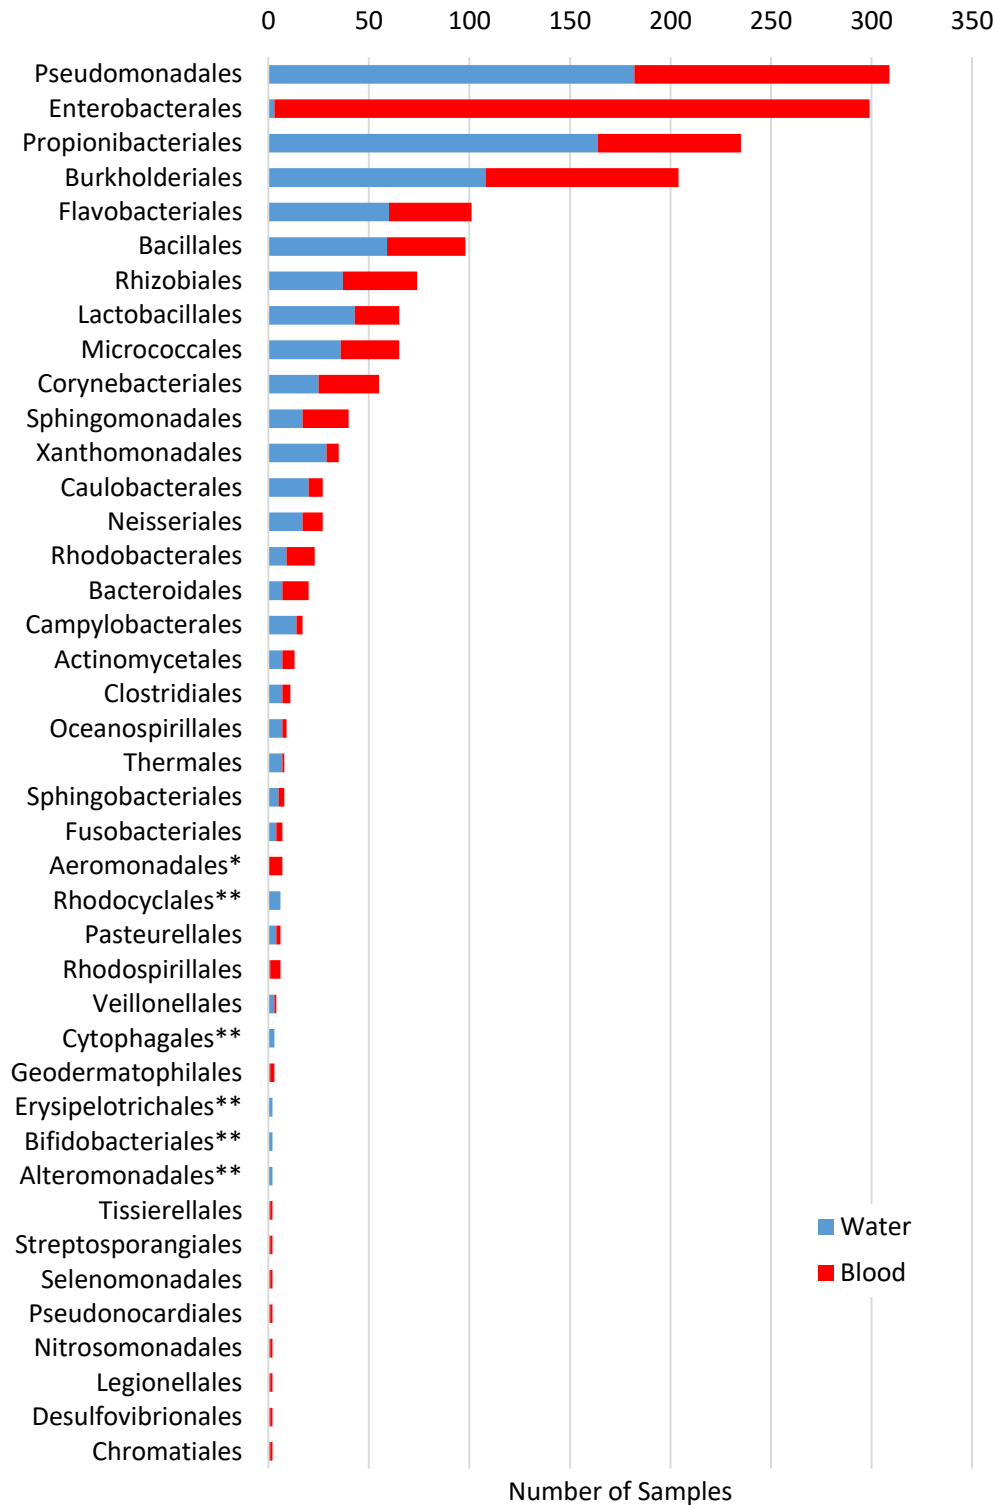

Supplemental Fig 3: Full list of identified tax in control water and blood specimens. Blood specimens are shown in red, water specimens are shown in blue.

Supplemental Table 1: Sequencing information and statistics

| Run Number | Concentration (pM) | PhiX Spike (%) | >Q30 | Clusters Passing Filter | Cluster Density (K/mm2) | PhiX Aligned (%) | Total Reads | Reads Passing Filter | <i>E. coli</i> DNA Controls: Average % of total | <i>E. coli</i> Spiked in Blood Controls: Average % of Total | Low <i>Borrelia</i> Controls: Average % of Total |
|------------|--------------------|----------------|------|-------------------------|-------------------------|------------------|-------------|----------------------|-------------------------------------------------|-------------------------------------------------------------|--------------------------------------------------|
| 1          | 13                 | 10             | 81.1 | 77.49 +/- 1.50          | 766 +/- 47              | 20.15 +/- 1.09   | 17800264    | 13784918             | 96.86                                           | 89.25                                                       | No Low <i>Borrelia</i> controls                  |
| 2          | 13                 | 10             | 80.4 | 82.26 +/- 1.45          | 835 +/- 71              | 12.24 +/- 1.13   | 18924080    | 15547541             | 97.51                                           | 86.01                                                       | 76.27                                            |
| 3          | 13                 | 10             | 83.0 | 44.60 +/- 42.3          | 847 +/- 58              | 7.50 +/- 7.12    | 19271578    | 7915899              | 98.52                                           | 98.33                                                       | 76.02                                            |
| 4          | 13                 | 10             | 83.1 | 44.11 +/- 41.91         | 798 +/- 167             | 6.97 +/- 6.61    | 9439254     | 7766794              | 94.54                                           | 92.29                                                       | 75.65                                            |
| 5          | 13                 | 10             | 70.8 | 43.73 +/- 41.71         | 801 +/- 175             | 7.08 +/- 6.73    | 9363256     | 7602913              | 97.32                                           | 93.09                                                       | 77.12                                            |
| 6          | 12.5               | 10             | 79.3 | 79.94 +/- 2.03          | 983 +/- 87              | 8.14 +/- 0.38    | 21977116    | 17542822             | 96.50                                           | 98.24                                                       | 76.26                                            |
| 7          | 12.5               | 10             | 79.3 | 82.05 +/- 2.4           | 1039 +/- 76             | 7.84 +/- 0.63    | 22548534    | 18467356             | 93.92                                           | 69.49                                                       | 70.04                                            |
| 8          | 12.5               | 10             | 78.0 | 70.5 +/- 25.28          | 1041 +/- 94             | 6.68 +/- 2.39    | 20415080    | 16099766             | 94.72                                           | 91.17                                                       | 77.03                                            |
| 9          | 12.5               | 10             | 72.7 | 82.95 +/- 1.03          | 1105 +/- 67             | 5.81 +/- 0.38    | 23313693    | 19327582             | 95.60                                           | 95.03                                                       | 76.90                                            |
| 10         | 12.5               | 10             | 84.6 | 85.39 +/- 2.80          | 741 +/- 52              | 13.20 +/- 1.01   | 16953914    | 14453309             | 94.07                                           | 98.07                                                       | 75.97                                            |
| 11         | 12.5               | 10             | 78.8 | 64.34 +/- 34.37         | 854 +/- 79              | 9.11 +/- 4.90    | 19749215    | 12143071             | 97.34                                           | 94.77                                                       | 76.15                                            |
| 12         | 12.5               | 10             | 82.2 | 84.77 +/- 2.88          | 831 +/- 102             | 11.97 +/- 1.29   | 18312236    | 15432047             | 91.07                                           | 86.67                                                       | 76.63                                            |
| 13         | 12.5               | 10             | 84.1 | 83.92 +/- 4.44          | 712 +/- 69              | 13.85 +/- 1.21   | 16371565    | 13668279             | 94.97                                           | 93.87                                                       | 76.23                                            |
| 14         | 12.5               | 10             | 81.8 | 79.81 +/- 1.35          | 739 +/- 23              | 18.51 +/- 0.59   | 17082129    | 13634026             | 94.10                                           | 93.11                                                       | 76.61                                            |
| 15         | 12.5               | 10             | 84.2 | 80.03 +/- 1.63          | 709 +/- 23              | 18.23 +/- 0.53   | 16389256    | 13121993             | 93.19                                           | 90.95                                                       | 75.87                                            |
| 16         | 12.5               | 10             | 73.2 | 75.12 +/- 1.00          | 1186 +/- 48             | 2.28 +/- 0.14    | 24402085    | 18325995             | 95.26                                           | 93.69                                                       | 77.65                                            |
| 17         | 12.5               | 10             | 79.0 | 83.37 +/- 1.27          | 1088 +/- 66             | 6.92 +/- 0.29    | 23202496    | 19333202             | 95.84                                           | 91.16                                                       | 77.48                                            |
| 18         | 12.5               | 10             | 76.2 | 80.54 +/- 1.24          | 1092 +/- 63             | 7.03 +/- 0.21    | 23350132    | 18798341             | 95.93                                           | 97.83                                                       | 76.44                                            |
| 19         | 12.5               | 10             | 80.1 | 79.98 +/- 3.23          | 811 +/- 72              | 11.52 +/- 0.76   | 18735551    | 14948127             | 97.11                                           | 97.49                                                       | 76.64                                            |
| 20         | 12.5               | 10             | 81.5 | 82.99 +/- 0.82          | 776 +/- 49              | 12.82 +/- 0.36   | 18112928    | 15031053             | 95.45                                           | 95.17                                                       | 76.68                                            |
| 21         | 12.5               | 10             | 82.6 | 85.42 +/- 1.48          | 885 +/- 63              | 9.15 +/- 0.43    | 19276560    | 16447463             | 94.28                                           | 91.64                                                       | 77.16                                            |
| 22         | 12.5               | 10             | 77.0 | 74.06 +/- 3.92          | 1008 +/- 75             | 8.10 +/- 0.37    | 22523040    | 16664736             | 96.71                                           | 96.09                                                       | 66.84                                            |
| 23         | 12.5               | 10             | 82.3 | 76.06 +/- 15.98         | 741 +/- 59              | 15.93 +/- 3.53   | 16707118    | 13099067             | 95.54                                           | 94.43                                                       | 75.52                                            |
| 24         | 12.5               | 10             | 85.7 | 82.64 +/- 3.26          | 756 +/- 28              | 25.42 +/- 1.8    | 16665204    | 13727928             | 95.62                                           | 96.81                                                       | 76.99                                            |
| 25         | 12.5               | 10             | 84.4 | 79.38 +/- 3.43          | 696 +/- 18              | 14.7 +/- 1.13    | 15847596    | 12558303             | 98.02                                           | 93.55                                                       | 75.12                                            |
| 26         | 12.5               | 10             | 81.2 | 80.38 +/- 3.60          | 787 +/- 59              | 14.18 +/- 1.19   | 18586619    | 14899088             | 97.06                                           | 95.25                                                       | 75.60                                            |
| 27         | 12.5               | 10             | 85.9 | 86.09 +/- 1.34          | 755 +/- 58              | 13.66 +/- 0.66   | 17377864    | 14946444             | 97.65                                           | 94.75                                                       | 76.99                                            |
| 28         | 12.5               | 10             | 81.1 | 82.61 +/- 3.85          | 889 +/- 86              | 11.66 +/- 0.92   | 20277941    | 16678700             | 98.72                                           | 97.52                                                       | 44.98                                            |
| 29         | 12.5               | 10             | 79.0 | 83.37 +/- 1.27          | 1088 +/- 66             | 6.92 +/- 0.29    | 23202496    | 19333202             | 88.05                                           | 87.42                                                       | 77.83                                            |
| 30         | 12.5               | 10             | 82.3 | 76.06 +/- 15.98         | 741 +/- 59              | 15.93 +/- 3.53   | 16707118    | 13099067             | 96.74                                           | 94.59                                                       | 75.76                                            |
| 31         | 12.5               | 10             | 84.0 | 83.95 +/- 2.34          | 738 +/- 57              | 13.35 +/- 1.21   | 16829236    | 14087992             | 95.84                                           | 92.70                                                       | 75.57                                            |
| 32         | 12.5               | 10             | 84.6 | 84.69 +/- 1.13          | 723 +/- 44              | 14.05 +/- 1.02   | 16318234    | 13806920             | 97.17                                           | 94.45                                                       | 74.99                                            |
| 33         | 12.5               | 10             | 85.3 | 84.3 +/- 1.17           | 673 +/- 44              | 14.08 +/- 0.81   | 15688812    | 13213318             | 98.37                                           | 96.90                                                       | 75.92                                            |
| 34         | 12.5               | 10             | 83.2 | 83.46 +/- 2.20          | 755 +/- 47              | 15.78 +/- 1.37   | 17303490    | 14405907             | 97.93                                           | 94.45                                                       | 76.20                                            |
| 35         | 12.5               | 10             | 84.9 | 83.46 +/- 1.97          | 707 +/- 43              | 16.42 +/- 0.09   | 16293986    | 13567605             | 98.15                                           | 97.15                                                       | 75.34                                            |
| 36         | 12.5               | 10             | 83.6 | 80.98 +/- 1.04          | 670 +/- 22              | 17.29 +/- 0.62   | 15573848    | 12614597             | 98.03                                           | 97.76                                                       | 72.24                                            |
| 37         | 12.5               | 10             | 83.2 | 81.46 +/- 0.95          | 696 +/- 31              | 16.89 +/- 0.55   | 16303711    | 13278946             | 98.08                                           | 97.09                                                       | 75.72                                            |
| 38         | 12.5               | 10             | 87.3 | 86.72 +/- 1.18          | 589 +/- 47              | 15.85 +/- 0.73   | 13675639    | 11845317             | 98.34                                           | 96.78                                                       | 69.59                                            |
| 39         | 12.5               | 10             | 85.3 | 84.24 +/- 1.62          | 677 +/- 40              | 16.05 +/- 0.91   | 15712387    | 13214268             | 98.52                                           | 96.08                                                       | 60.56                                            |
| 40         | 12.5               | 10             | 82.0 | 78.14 +/- 15.43         | 731 +/- 59              | 14.84 +/- 3.05   | 16422703    | 13276807             | 96.72                                           | 95.81                                                       | 75.35                                            |
| 41         | 12.5               | 10             | 79.4 | 77.55 +/- 1.97          | 763 +/- 42              | 17.05 +/- 0.50   | 17932906    | 13912961             | 98.29                                           | 97.42                                                       | 77.02                                            |
| 42         | 12.5               | 10             | 86.8 | 82.06 +/- 1.73          | 609 +/- 18              | 19.48 +/- 0.53   | 14112136    | 11584263             | 97.10                                           | 97.26                                                       | 75.57                                            |
| 43         | 12.5               | 10             | 84.5 | 82.89 +/- 0.80          | 667 +/- 32              | 16.05 +/- 0.33   | 15778874    | 13078902             | 96.27                                           | 96.29                                                       | 75.18                                            |
| 44         | 12.5               | 10             | 83.7 | 83.04 +/- 0.92          | 693 +/- 45              | 16.14 +/- 0.75   | 16277052    | 13506896             | 98.14                                           | 95.75                                                       | 75.30                                            |
| 45         | 12.5               | 10             | 82.5 | 83.07 +/- 1.94          | 780 +/- 63              | 14.21 +/- 0.89   | 18004388    | 14925086             | 96.53                                           | 93.65                                                       | 77.15                                            |
| 46         | 12.5               | 10             | 83.8 | 84.00 +/- 0.92          | 757 +/- 33              | 11.79 +/- 0.73   | 16337282    | 13716049             | 96.76                                           | 93.55                                                       | 45.87                                            |

Supplemental Table 2: Full list of identified taxa in clinical specimens after background subtraction.

| <b>Order</b>         | <b>Relative Percentage After Subtraction</b> |
|----------------------|----------------------------------------------|
| Rickettsiales        | 54.63%                                       |
| Spirochaetales       | 9.99%                                        |
| Deinococcales        | 6.15%                                        |
| Chitinophagales      | 3.33%                                        |
| Thiotrichales        | 2.89%                                        |
| Synechococcales      | 1.95%                                        |
| Verrucomicrobiales   | 1.88%                                        |
| Sphaerobacterales    | 1.59%                                        |
| Leptospirales        | 1.37%                                        |
| Acholeplasmatales    | 1.16%                                        |
| Glycomycetales       | 1.16%                                        |
| Cellvibrionales      | 1.09%                                        |
| Syntrophobacterales  | 1.09%                                        |
| Micromonosporales    | 1.01%                                        |
| Bryobacterales       | 0.80%                                        |
| Solirubrobacterales  | 0.80%                                        |
| Nakamurellales       | 0.72%                                        |
| Pelagibacterales     | 0.65%                                        |
| Myxococcales         | 0.58%                                        |
| Desulfuromonadales   | 0.51%                                        |
| Deferribacterales    | 0.43%                                        |
| Fimbriimonadales     | 0.43%                                        |
| Mycoplasmatales      | 0.36%                                        |
| Nitrospirales        | 0.36%                                        |
| Planctomycetales     | 0.36%                                        |
| Vibrionales          | 0.36%                                        |
| Gemmatimonadales     | 0.29%                                        |
| Thermotogales        | 0.29%                                        |
| Acidiferrobacterales | 0.22%                                        |
| Bdellovibrionales    | 0.22%                                        |
| Chroococciopsidales  | 0.22%                                        |
| Coriobacterales      | 0.22%                                        |
| Eggerthellales       | 0.22%                                        |
| Holosporales         | 0.22%                                        |
| Nevskiales           | 0.22%                                        |
| Synergistales        | 0.22%                                        |
| Acidimicrobiales     | 0.14%                                        |
| Anaerolineales       | 0.14%                                        |
| Aquificales          | 0.14%                                        |
| Chroococcales        | 0.14%                                        |
| Dehalococcoidales    | 0.14%                                        |
| Frankiales           | 0.14%                                        |
| Kineosporiales       | 0.14%                                        |
| Nostocales           | 0.14%                                        |
| Saprospirales        | 0.14%                                        |

Supplemental Table 3: Assays used for secondary verification of taxonomic prediction/identifications

| Assay                                    | Primer/Probe              | Primer/Probe Sequence (5'→ 3')                               | Final Concentration (μM) | Annealing Temp (°C) | Reference                                     |
|------------------------------------------|---------------------------|--------------------------------------------------------------|--------------------------|---------------------|-----------------------------------------------|
| <b>pan-Borrelia Taqman PCR</b>           | Forward Primer            | AGC YTT TAA AGC TTC GCT TGT AG                               | 0.6                      | 60                  | Kingry <i>et al.</i> 2018                     |
|                                          | Reverse Primer            | GCC TCC CGT AGG AGT CTG G                                    | 0.6                      |                     |                                               |
|                                          | Probe                     | /6FAM/-CCG GCC TGA /ZEN/ GAG GGT GAW CGG-/3IABkFQ/           | 0.2                      |                     |                                               |
| <b>Anaplasma/Ehrlichia real-time PCR</b> | Forward Primer (Esp-F)    | TAC TCA GAG TGC TTC TCA ATG T                                | 0.5                      | 55                  | Johnson <i>et al.</i> 2015                    |
|                                          | Reverse Primer (Esp-R)    | GCA TAC CAT CAG TTT TTT CAA C                                | 0.5                      |                     |                                               |
|                                          | Ehrlichia Probe (948-EHR) | ATT TCA GCT AAT GGA GAT AAG AAT ATA-/3FlourT/                | 0.2                      |                     |                                               |
|                                          | Anaplasma Probe (949-AP)  | CAT TGT CTG CGA ATG GAG ACA AGA ACA TAG GA-/3FlourT/         | 0.2                      |                     |                                               |
|                                          | LC640 Probe               | /LC640/-GTA AGA TTG CAC AGT GTG TTC AAG AAG TCG GTA-/3Phos/  | 0.4                      |                     |                                               |
| <b>16S V1-V4 Sequencing</b>              | Forward Primer 1*         | TAA /i5NitInd/AC ATG CAA GTC RAR CG                          | 0.2-1.6                  | 55                  | Modified based on Marchesi <i>et al.</i> 1998 |
|                                          | Forward Primer 2#         | TAA CAC ATG CAA GTC GAA CG                                   | 0.4                      |                     |                                               |
|                                          | Reverse Primer (926R)     | CCG TCA ATT CCT TTG AGT TT                                   | 0.2-0.4                  |                     | Schwieger <i>et al.</i> 1998                  |
| <b>pan-Rickettsia Taqman PCR</b>         | Forward Primer (PANR8_F)  | AGC TTG CTT TTG GAT CAT TTG G                                | 1                        | 60                  | Kato <i>et al.</i> 2013                       |
|                                          | Reverse Primer (PANR8_R)  | TTC CTT GCC TTT TCA TAC ATC TAG T                            | 1                        |                     |                                               |
|                                          | Probe (PANR8_P)           | /5FluorT/-CCT GCT TCT ATT TGT CTT GCA GTA ACA CGC CA-/3BHQ1/ | 0.04                     |                     |                                               |
| <b>Francisella Taqman PCR</b>            | Forward Primer            | GAG ACA TCA ATT AAA AGA AGC AAT ACC TT                       | 0.75                     | 65                  | Kugeler <i>et al.</i> 2006                    |
|                                          | Reverse Primer            | CCA AGA GTA CTA TTT CCG GTT GGT                              | 0.75                     |                     |                                               |
|                                          | Probe                     | /6FAM/-AAA ATT CTG C/BHQ1/C AGC AGG ATT TTG ATT TGG T        | 0.2                      |                     |                                               |

\*Forward Primer 1 was used for non-Rickettsiales

# Forward Primer 2 was used for Rickettsiales

Supplemental Table 4: Genetic pairwise distance table of an 837 bp fragment of 16S rDNA.

| <b>Organism</b>                 | <b>GenBank Number</b> |           | <b>1</b> | <b>2</b> | <b>3</b> | <b>4</b> | <b>5</b> | <b>6</b> | <b>7</b> | <b>8</b> | <b>9</b> |
|---------------------------------|-----------------------|-----------|----------|----------|----------|----------|----------|----------|----------|----------|----------|
| Blood sample- OK (15-3642)      | MG429812              | <b>1</b>  |          |          |          |          |          |          |          |          |          |
| Blood sample- MN (15-6842)      |                       | <b>2</b>  | 0.000    |          |          |          |          |          |          |          |          |
| Uncultured <i>Anaplasma</i> sp. | JN862824.1            | <b>3</b>  | 0.013    | 0.013    |          |          |          |          |          |          |          |
| <i>A. bovis</i> S <sub>T</sub>  | U03775.1              | <b>4</b>  | 0.017    | 0.017    | 0.013    |          |          |          |          |          |          |
| <i>A. platys</i>                | AF156784.1            | <b>5</b>  | 0.033    | 0.033    | 0.032    | 0.026    |          |          |          |          |          |
| <i>A. phagocytophilum</i>       | NR_044762.1           | <b>6</b>  | 0.041    | 0.041    | 0.035    | 0.033    | 0.019    |          |          |          |          |
| <i>A. ovis</i>                  | AF309865.1            | <b>7</b>  | 0.055    | 0.055    | 0.055    | 0.046    | 0.037    | 0.040    |          |          |          |
| <i>A. marginale</i>             | NC_012026.1           | <b>8</b>  | 0.055    | 0.055    | 0.055    | 0.046    | 0.037    | 0.040    | 0.000    |          |          |
| <i>A. centrale</i>              | NC_013532.1           | <b>9</b>  | 0.054    | 0.054    | 0.051    | 0.045    | 0.040    | 0.038    | 0.005    | 0.005    |          |
| <i>R. rickettsii</i>            | L36217.1              | <b>10</b> | 0.191    | 0.191    | 0.201    | 0.201    | 0.193    | 0.185    | 0.186    | 0.186    | 0.188    |

Supplemental Table 5: Breakdown of number of blood specimens by Lot Number with a given taxonomic prediction.

| Lot #               | 1  | 2  | 3  | 4  | 5  | 6  | Total |
|---------------------|----|----|----|----|----|----|-------|
| n                   | 93 | 90 | 97 | 45 | 53 | 54 | 432   |
| Enterobacterales    | 64 | 65 | 68 | 29 | 33 | 37 | 296   |
| Pseudomonadales     | 31 | 20 | 26 | 6  | 22 | 22 | 127   |
| Burkholderiales     | 20 | 24 | 27 | 9  | 8  | 8  | 96    |
| Propionibacteriales | 12 | 10 | 15 | 0  | 20 | 14 | 71    |
| Flavobacteriales    | 9  | 13 | 13 | 0  | 4  | 2  | 41    |
| Bacillales          | 7  | 8  | 10 | 5  | 3  | 6  | 39    |
| Rhizobiales         | 10 | 12 | 8  | 0  | 3  | 4  | 37    |
| Corynebacteriales   | 7  | 8  | 8  | 0  | 4  | 3  | 30    |
| Micrococcales       | 6  | 8  | 10 | 2  | 2  | 1  | 29    |
| Sphingomonadales    | 5  | 6  | 5  | 1  | 5  | 1  | 23    |
| Lactobacillales     | 7  | 0  | 4  | 2  | 6  | 3  | 22    |
| Rhodobacterales     | 1  | 3  | 6  | 0  | 1  | 3  | 14    |
| Bacteroidales       | 0  | 6  | 2  | 2  | 2  | 1  | 13    |
| Neisseriales        | 2  | 0  | 3  | 1  | 2  | 2  | 10    |
| Aeromonadales       | 2  | 3  | 2  | 0  | 0  | 0  | 7     |
| Caulobacterales     | 0  | 2  | 3  | 1  | 0  | 1  | 7     |
| Actinomycetales     | 0  | 1  | 2  | 0  | 1  | 2  | 6     |
| Xanthomonadales     | 0  | 1  | 3  | 2  | 0  | 0  | 6     |
| Rhodospirillales    | 2  | 1  | 1  | 0  | 1  | 0  | 5     |
| Clostridiales       | 0  | 2  | 2  | 0  | 0  | 0  | 4     |
| Campylobacterales   | 0  | 0  | 0  | 0  | 3  | 0  | 3     |
| Fusobacteriales     | 0  | 1  | 1  | 0  | 1  | 0  | 3     |
| Sphingobacteriales  | 0  | 1  | 1  | 1  | 0  | 0  | 3     |
| Geodermatophilales  | 0  | 0  | 0  | 0  | 1  | 1  | 2     |
| Oceanospirillales   | 0  | 0  | 1  | 0  | 0  | 1  | 2     |
| Pasteurellales      | 0  | 0  | 1  | 0  | 0  | 1  | 2     |
| Acidobacteriales    | 0  | 0  | 0  | 0  | 1  | 0  | 1     |
| Bdellovibrionales   | 0  | 0  | 0  | 0  | 1  | 0  | 1     |
| Chromatiales        | 0  | 0  | 1  | 0  | 0  | 0  | 1     |
| Deferribacteriales  | 0  | 0  | 1  | 0  | 0  | 0  | 1     |
| Desulfovibrionales  | 0  | 0  | 1  | 0  | 0  | 0  | 1     |
| Legionellales       | 0  | 0  | 1  | 0  | 0  | 0  | 1     |
| Nitrosomonadales    | 0  | 1  | 0  | 0  | 0  | 0  | 1     |
| Nostocales          | 0  | 0  | 0  | 0  | 1  | 0  | 1     |
| Oscillatoriales     | 0  | 0  | 0  | 0  | 0  | 1  | 1     |
| Pseudonocardiales   | 0  | 0  | 1  | 0  | 0  | 0  | 1     |
| Rubrobacterales     | 0  | 0  | 1  | 0  | 0  | 0  | 1     |
| Selenomonadales     | 0  | 0  | 0  | 0  | 1  | 0  | 1     |
| Streptomyocetales   | 0  | 0  | 1  | 0  | 0  | 0  | 1     |
| Streptosporangiales | 0  | 1  | 0  | 0  | 0  | 0  | 1     |
| Thermales           | 0  | 0  | 1  | 0  | 0  | 0  | 1     |
| Thermotogales       | 0  | 0  | 1  | 0  | 0  | 0  | 1     |
| Thiotrichales       | 0  | 0  | 1  | 0  | 0  | 0  | 1     |
| Tissierellales      | 0  | 1  | 0  | 0  | 0  | 0  | 1     |
| Veillonellales      | 0  | 0  | 0  | 0  | 1  | 0  | 1     |



## References:

- Kingry LC, Anacker M, Pritt B, Bjork J, Respicio-Kingry L, Liu G, Sheldon S, Boxrud D, Strain A, Oatman S, Berry J, Sloan L, Mead P, Neitzel D, Kugeler KJ, Petersen JM. 2018. Surveillance for and Discovery of *Borrelia* Species in US Patients Suspected of Tickborne Illness. *Clin Infect Dis* 66:1864-1871.
- Johnson DK, Schiffman EK, Davis JP, Neitzel DF, Sloan LM, Nicholson WL, Fritsche TR, Steward CR, Ray JA, Miller TK, Feist MA, Uphoff TS, Franson JJ, Livermore AL, Deedon AK, Theel ES, Pritt BS. 2015. Human Infection with *Ehrlichia muris*-like Pathogen, United States, 2007-2013(1). *Emerg Infect Dis* 21:1794-9.
- Marchesi JR, Sato T, Weightman AJ, Martin TA, Fry JC, Hiom SJ, Wade WG. 1998. Design and evaluation of useful bacterium-specific PCR primers that amplify genes coding for bacterial 16S rRNA. *Appl and Environ Micro*. Feb 1;64(2):795-9.
- Schwieger F, Tebbe CC. 1998. A new approach to utilize PCR–single-strand-conformation polymorphism for 16S rRNA gene-based microbial community analysis. *Appl and Environ Micro* Dec 1;64(12):4870-6.
- Kato CY, Chung IH, Robinson LK, Austin AL, Dasch GA, Massung RF. 2013. Assessment of real-time PCR assay for detection of *Rickettsia* spp. and *Rickettsia rickettsii* in banked clinical samples. *J Clin Microbiol* 51:314-7.
- Kugeler KJ, Pappert R, Zhou Y, Petersen JM. 2006. Real-time PCR for *Francisella tularensis* types A and B. *Emerg Infect Dis* 12:1799-801.
